# Supplementary material
Source: publisher figshare collection journal article supplement (https://rs.figshare.com/ndownloader/files/6453018)
Supplement: Supplementary file 1 [file 6453018]

% Figure1

% reproduces the dynamics over several generations(gmax)

%at a given density

density=13;

gmax=200

teta=5;%strenth of resistance

alpha=0.01;%relative mortaliy of R females

p0=0.5;% initial frequency of R

f0=0.5; %initial frequency of females

beta=1;%beta is the exponent of the Male encounter rate

data=dynamics(density,teta,alpha,p0,f0,beta,gmax);

% create Figure

figure(2);

plot(data(:,1:4));

ylim([0 1])

xlabel('generations')

ylabel('frequency in population')

legend({'Females_r','Females_R', 'Males_r', 'Males_R'},'FontSize',8,'FontWeight','bold')

colormap bone
